# Supplementary material for: Near Normalization of Metabolic and Functional Features of the Central Nervous System in Type 1 Diabetic Patients With End-Stage Renal Disease After Kidney-Pancreas Transplantation
Source: PubMed Central journal article supplement — Diabetes Care. 2012 Jan 16;35(2):367–74. doi: 10.2337/dc11-1697 (PMC3263904; doi:10.2337/dc11-1697), 2012-01-16
Supplement: supp_dc11-1697v111697_DC111697SupplementaryData.pdf [file supp_dc11-1697v111697_DC111697SupplementaryData.pdf]

SUPPLEMENTARY DATA

**Supplementary Figure 1.** NAA/Cr – HbA1c (%) correlation. Statistical analysis showed a linear inverse correlation between glycated hemoglobin [HbA1c (%)] and N-acetylaspartate over total creatine ratio (NAA/Cr) in our sample ( $r=-0.353$ ,  $p<0.030$ ).

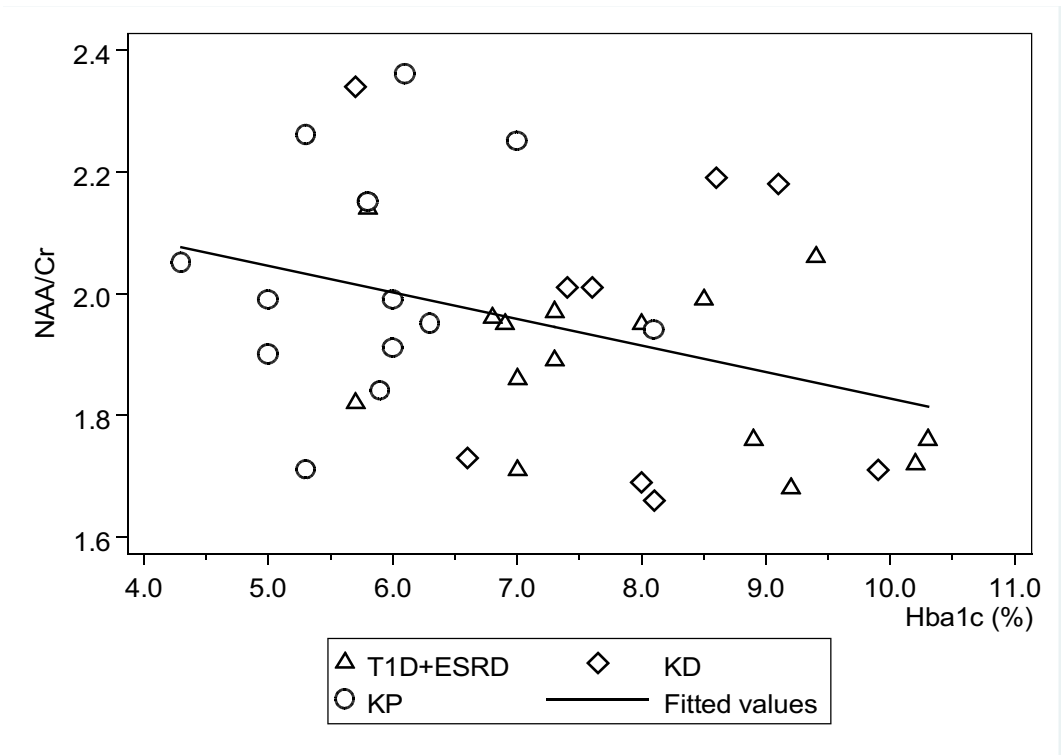

**Abbreviations.** ESRD+T1D: uremic patients with type 1 diabetes; KD: kidney transplanted patients; KP: kidney-pancreas transplanted patients
